# Supplementary material
Source: publisher figshare collection journal article supplement (https://acs.figshare.com/ndownloader/files/5227747)
Supplement: Supplementary file 1 [file 5227747]

## **Dietary and Household Sources of Prenatal Exposure to Polybrominated Diphenyl Ethers (PBDEs) in the INMA Birth Cohort (Spain)**

Olga Costa,<sup>†</sup> Maria-Jose Lopez-Espinosa,<sup>\*,†,‡</sup> Esther Vizcaino,<sup>§,||</sup> Mario Murcia,<sup>‡,†</sup> Carmen Iñiguez,<sup>†,‡</sup> Eva M. Navarrete-Muñoz,<sup>‡,⊥</sup> Joan O. Grimalt,<sup>||</sup> Adonina Tardon,<sup>§,‡</sup> Ferran Ballester,<sup>†,‡</sup> and Ana Fernandez-Somoano<sup>§,‡</sup>

<sup>†</sup>Epidemiology and Environmental Health Joint Research Unit, FISABIO–Universitat Jaume I–Universitat de València, Avenida de Catalunya 21, 46020 Valencia, Spain

<sup>‡</sup>Spanish Consortium for Research on Epidemiology and Public Health (CIBERESP), Calle Monforte de Lemos 3-5, 28029 Madrid, Spain

<sup>§</sup>Department of Preventive Medicine and Public Health, University of Oviedo, Campus del Cristo s/n, 33006 Oviedo, Asturias, Spain

<sup>||</sup>Department of Environmental Chemistry, Institute of Environmental Assessment and Water Research (IDÆA-CSIC), Jordi Girona 18, 08034 Barcelona, Spain

<sup>⊥</sup>Department of Public Health, Miguel Hernandez University, Ctra. Nacional 332, San Juan de Alicante, 03550 Alicante, Spain

**Corresponding author:** \*Maria-Jose Lopez-Espinosa

Foundation for the Promotion of Health and Biomedical Research in the Valencian Region, FISABIO-Public Health, Avda Catalunya 21, 46020 Valencia, Spain. E-mail: lopez\_josp@gva.es; Phone: (+34) 961925941.

Number of pages: 8

Number of tables: 5

**Table S1. Definition of food groups: The Asturias and Valencia INMA Cohorts (Spain), 2003-2008**

| <b>Food groups</b>        | <b>Foods</b>                                                                                                                                                                                                              |
|---------------------------|---------------------------------------------------------------------------------------------------------------------------------------------------------------------------------------------------------------------------|
| Eggs                      | Eggs                                                                                                                                                                                                                      |
| Dairy products            | Whole milk; semi-skimmed milk; skimmed or low-fat milk; condensed milk; full cream; whole fat yogurt; low-fat yogurt; whole-fat cheese; low-fat cheese; custard, creme caramel, pudding; and ice-cream                    |
| Meat                      | Chicken or turkey; game (duck, quail, and rabbit); beef, pork or lamb; liver; offal; hamburger; ham, salami and others; sausages; pate; and bacon                                                                         |
| Cereals and pasta         | Breakfast cereals; corn; rice; and pasta                                                                                                                                                                                  |
| Vegetables and pulses     | Spinach; cabbage, cauliflower or broccoli; lettuce or endive; tomatoes; onions; carrots or squash; green beans; eggplant, zucchini, or cucumber; green, red, or yellow peppers; artichokes; asparagus; garlic; and pulses |
| Fruits                    | Oranges; orange juice; bananas; apples or pears; peaches, nectarines, or apricots; watermelon or melon; grapes; prunes or plums; kiwis; and olives                                                                        |
| Shellfish and cephalopods | Crabs, shrimps, or lobster; clams or mussels; and squid and octopus                                                                                                                                                       |
| Fish                      | Lean fish; large oily fish; other oily fish; and other fish                                                                                                                                                               |
| Lean fish                 | Hake, sole, gilthead and similar types of white fish                                                                                                                                                                      |
| Large oily fish           | Swordfish, bonito, and fresh tuna; and canned tuna                                                                                                                                                                        |
| Other oily fish           | Mackerel, sardine, anchovy, or salmon; and canned sardine or mackerel                                                                                                                                                     |
| Other fish                | Assorted or mixed fried fish; dry or smoked fish; and surimi and other fish-based food products                                                                                                                           |

**Table S2. Study population: The Asturias and Valencia INMA Cohorts (Spain), 2003-2008**

|                                     | <b>Excluded<br/>(n=731)</b> | <b>Included<br/>(n=541)</b> | <b>OR<sup>a</sup></b> | <b>p<sup>a</sup></b> |
|-------------------------------------|-----------------------------|-----------------------------|-----------------------|----------------------|
| Age: yrs                            | 30.3 (4.6)                  | 30.8 (4.5)                  | 0.99                  | 0.61                 |
| Height: cm                          | 162.1 (6.2)                 | 162.2 (6.3)                 | 1.00                  | 0.83                 |
| BMI: kg/m <sup>2</sup>              | 23.9 (4.7)                  | 23.7 (4.3)                  | 0.99                  | 0.45                 |
| Country of birth: n(%)              |                             |                             |                       | 0.39                 |
| Spain                               | 654 (90)                    | 507 (94)                    | ref                   |                      |
| Other                               | 77 (11)                     | 34 (6)                      | 0.82                  |                      |
| Area of residence: n(%)             |                             |                             |                       | 0.68                 |
| No rural                            | 674 (92)                    | 489 (90)                    | ref                   |                      |
| Rural                               | 57 (8)                      | 52 (10)                     | 0.92                  |                      |
| Working <sup>b</sup> : n(%)         |                             |                             |                       | <0.001               |
| No                                  | 161 (22)                    | 105 (19)                    | ref                   |                      |
| Yes                                 | 570 (78)                    | 436 (81)                    | 1.56                  |                      |
| Parity: n(%)                        |                             |                             |                       | 0.39                 |
| Primiparous                         | 405 (55)                    | 324 (60)                    | ref                   |                      |
| Multiparous                         | 326 (45)                    | 217 (40)                    | 0.90                  |                      |
| Previous lactation: n(%)            |                             |                             |                       | 0.87                 |
| None                                | 470 (64)                    | 358 (66)                    | ref                   |                      |
| < 6 months                          | 136 (19)                    | 104 (19)                    | 1.00                  |                      |
| ≥ 6 months                          | 125 (17)                    | 78 (14)                     | 1.09                  |                      |
| Education: n(%)                     |                             |                             |                       | 0.23                 |
| Until primary                       | 225 (31)                    | 130 (24)                    | ref                   |                      |
| Secondary                           | 324 (44)                    | 227 (42)                    | 0.96                  |                      |
| University                          | 182 (25)                    | 184 (34)                    | 1.22                  |                      |
| Social class <sup>c</sup> : n(%)    |                             |                             |                       | 0.31                 |
| I (highest)                         | 165 (23)                    | 162 (30)                    | ref                   |                      |
| II (medium)                         | 195 (27)                    | 127 (24)                    | 0.81                  |                      |
| III (lowest)                        | 371 (51)                    | 251 (47)                    | 0.81                  |                      |
| Smoking <sup>b</sup>                |                             |                             |                       | 0.23                 |
| No                                  | 429 (60)                    | 358 (68)                    | ref                   |                      |
| Yes                                 | 282 (40)                    | 167 (32)                    | 0.85                  |                      |
| Passive smoking <sup>d</sup> : n(%) |                             |                             |                       | 0.33                 |
| No                                  | 213 (30)                    | 220 (42)                    | ref                   |                      |
| Yes                                 | 492 (70)                    | 301 (58)                    | 0.88                  |                      |
| Alcohol intake <sup>b</sup> : n(%)  |                             |                             |                       | 0.93                 |
| No                                  | 611 (84)                    | 479 (89)                    | ref                   |                      |
| Yes                                 | 113 (16)                    | 61 (11)                     | 0.98                  |                      |

Values are *n* (%) or mean (standard deviation). BMI: Body mass index (before pregnancy). <sup>a</sup>Inclusion OR and p-value from logistic models adjusted by cohort; <sup>b</sup>At week 12 of pregnancy; <sup>c</sup>Class I: managerial jobs, senior technical staff, and commercial managers, Class II: skilled nonmanual workers, Class III: manual workers; <sup>d</sup>In at least two environments from among home, workplace, and leisure areas or restaurants.

**Table S3. Dietary and household-level factors: The Asturias and Valencia INMA Cohorts (Spain), 2003-2008**

|                            | <b>Excluded<br/>(n=731)</b> | <b>Included<br/>(n=541)</b> | <b>OR<sup>a</sup></b> | <b>p<sup>a</sup></b> |
|----------------------------|-----------------------------|-----------------------------|-----------------------|----------------------|
| <b>Dietary variables</b>   |                             |                             |                       |                      |
| Eggs: g/d                  | 20.1 (8.2)                  | 20.8 (8.2)                  | 1.01                  | 0.18                 |
| Dairy products: g/d        | 539.3 (241.8)               | 558.9 (241.4)               | 0.94                  | 0.01                 |
| Meat: g/d                  | 121.7 (46.8)                | 106.4 (41.6)                | 0.90                  | 0.48                 |
| Cereals and pasta: g/d     | 111.1 (43.8)                | 95.3 (43.1)                 | 0.78                  | 0.09                 |
| Veg. and pulses: g/d       | 246.9 (117)                 | 245.6 (121.2)               | 0.96                  | 0.40                 |
| Fruits: g/d                | 314.4 (181.6)               | 344.8 (207.3)               | 1.03                  | 0.36                 |
| Shellfish and ceph.: g/d   | 12.6 (10.7)                 | 11.5 (9.2)                  | 0.34                  | 0.08                 |
| Fish: g/d                  | 62.3 (37)                   | 70.7 (41.4)                 | 1.03                  | 0.86                 |
| Lean fish: sv/wk           | 1.2 (1)                     | 1.2 (1)                     | 1.02                  | 0.73                 |
| Large oily fish: sv/wk     | 2.2 (1.5)                   | 2.4 (1.6)                   | 0.97                  | 0.50                 |
| Other oily fish: sv/wk     | 0.6 (0.9)                   | 0.6 (0.8)                   | 0.95                  | 0.53                 |
| Other fish: sv/wk          | 1.3 (1.4)                   | 1.5 (1.3)                   | 0.98                  | 0.71                 |
| <b>Household variables</b> |                             |                             |                       |                      |
| House size: m <sup>2</sup> | 104.5 (44.3)                | 99.9 (54.8)                 | 1.00                  | 0.47                 |
| Curtains at home: n(%)     |                             |                             |                       | 0.67                 |
| No                         | 33 (5)                      | 33 (6)                      | ref                   |                      |
| Yes                        | 677 (95)                    | 492 (94)                    | 0.89                  |                      |
| Carpets at home: n(%)      |                             |                             |                       | 0.48                 |
| No                         | 398 (56)                    | 255 (49)                    | ref                   |                      |
| Yes                        | 309 (44)                    | 270 (51)                    | 0.91                  |                      |
| Mattress: n(%)             |                             |                             |                       | 0.37                 |
| Innerspring                | 455 (67)                    | 322 (64)                    | ref                   |                      |
| Foam                       | 222 (33)                    | 180 (36)                    | 1.13                  |                      |
| Housekeeping: n(%)         |                             |                             |                       | 0.46                 |
| >1 t/wk                    | 391 (55)                    | 326 (62)                    | ref                   |                      |
| ≤1 t/wk                    | 318 (45)                    | 199 (38)                    | 1.10                  |                      |
| TV use: h/wk               | 16.2 (8.9)                  | 15 (7.9)                    | 1.00                  | 0.88                 |

Values are *n* (%) or mean (standard deviation).

Ceph.: cephalopods; g/d: grams per day; h/wk: hours per week; sv/w: servings per week; t/wk: times per week; Veg.: Vegetables.

<sup>a</sup>Inclusion OR and p-value from logistic models adjusted by cohort. For daily intake variables, OR are expressed for each 100 g increase in daily intake.

**Table S4. Sensitivity analysis: The Asturias and Valencia INMA Cohorts (Spain), 2003-2008**

|                       | Main analysis <sup>a</sup> |               |       | Adding lipids <sup>a</sup> |               |       | Dichotomized BDE-209 <sup>b</sup> |                |       |
|-----------------------|----------------------------|---------------|-------|----------------------------|---------------|-------|-----------------------------------|----------------|-------|
|                       | %change                    | (95%CI)       | p     | %change                    | (95%CI)       | p     | OR                                | (95%CI)        | p     |
| <b>BDE-47</b>         |                            |               |       |                            |               |       |                                   |                |       |
| Shellfish and ceph.   | 13.6                       | (0.03, 29.0)  | 0.050 | 9.6                        | (-3.3, 24.2)  | 0.152 | -                                 | -              | -     |
| Fish                  | 13.2                       | (-0.5, 28.8)  | 0.061 | 12.9                       | (-0.8, 28.5)  | 0.067 | -                                 | -              | -     |
| Large oily fish       | 6.8                        | (-0.3, 14.4)  | 0.061 | 6.7                        | (-0.4, 14.3)  | 0.065 | -                                 | -              | -     |
| Foam mattress         | 6.3                        | (-14.7, 32.4) | 0.588 | 6.6                        | (-14.4, 32.7) | 0.569 | -                                 | -              | -     |
| Housekeeping: >1 t/wk | 15.7                       | (-6.9, 43.8)  | 0.188 | 15.8                       | (-6.8, 43.8)  | 0.186 | -                                 | -              | -     |
| <b>BDE-99</b>         |                            |               |       |                            |               |       |                                   |                |       |
| Shellfish and ceph.   | 21.1                       | (2.3, 43.5)   | 0.027 | 18.6                       | (-0.0, 40.6)  | 0.051 | -                                 | -              | -     |
| Fish                  | 20.8                       | (1.7, 43.4)   | 0.032 | 19.7                       | (0.9, 42.0)   | 0.039 | -                                 | -              | -     |
| Large oily fish       | 13.8                       | (4.0, 24.7)   | 0.005 | 13.6                       | (3.8, 24.3)   | 0.006 | -                                 | -              | -     |
| Foam mattress         | -11.8                      | (-34.4, 18.6) | 0.407 | -11.4                      | (-34.0, 19.0) | 0.422 | -                                 | -              | -     |
| Housekeeping: >1 t/wk | 2.9                        | (-22.8, 37.1) | 0.847 | 3.2                        | (-22.4, 37.4) | 0.827 | -                                 | -              | -     |
| <b>BDE-153</b>        |                            |               |       |                            |               |       |                                   |                |       |
| Shellfish and ceph.   | 1.4                        | (-15.1, 21.0) | 0.879 | 1.7                        | (-14.9, 21.4) | 0.854 | -                                 | -              | -     |
| Fish                  | 8.2                        | (-9.4, 29.2)  | 0.387 | 8.4                        | (-9.2, 29.5)  | 0.372 | -                                 | -              | -     |
| Large oily fish       | 8.8                        | (-1.2, 19.7)  | 0.086 | 8.8                        | (-1.1, 19.8)  | 0.083 | -                                 | -              | -     |
| Foam mattress         | 8.2                        | (-19.6, 45.7) | 0.602 | 8.2                        | (-19.6, 45.6) | 0.605 | -                                 | -              | -     |
| Housekeeping: >1 t/wk | 35.9                       | (0.4, 83.9)   | 0.046 | 35.9                       | (0.4, 83.8)   | 0.046 | -                                 | -              | -     |
| <b>BDE-209</b>        |                            |               |       |                            |               |       |                                   |                |       |
| Shellfish and ceph.   | 21.7                       | (0.4, 47.5)   | 0.045 | 22.9                       | (1.3, 49.0)   | 0.036 | 1.023                             | (1.001, 1.046) | 0.039 |
| Fish                  | 14.9                       | (-7.1, 42.2)  | 0.200 | 15.2                       | (-6.9, 42.6)  | 0.192 | 1.003                             | (0.998, 1.006) | 0.276 |
| Large oily fish       | 8.0                        | (-3.5, 20.8)  | 0.182 | 8.1                        | (-3.4, 20.9)  | 0.177 | 1.088                             | (0.942, 1.253) | 0.248 |
| Foam mattress         | 48.9                       | (5.8, 109.7)  | 0.023 | 48.0                       | (5.2, 108.3)  | 0.025 | 1.593                             | (1.021, 2.487) | 0.040 |
| Housekeeping: >1 t/wk | -14.7                      | (-39.5, 20.2) | 0.364 | -14.8                      | (-39.5, 20.1) | 0.363 | 0.903                             | (0.584, 1.404) | 0.648 |

| <b><math>\Sigma</math>PBDEs</b> |      |               |       |      |              |       |   |   |   |
|---------------------------------|------|---------------|-------|------|--------------|-------|---|---|---|
| Shellfish and ceph.             | 11.5 | (2.2, 21.7)   | 0.015 | 11.5 | (2.2, 21.7)  | 0.015 | - | - | - |
| Fish                            | 9.1  | (-0.03, 19.0) | 0.051 | 9.0  | (-0.1, 19.0) | 0.053 | - | - | - |
| Large oily fish                 | 5.7  | (0.8, 10.8)   | 0.021 | 5.7  | (0.8, 10.8)  | 0.022 | - | - | - |
| Foam mattress                   | 8.9  | (-6.0, 26.2)  | 0.255 | 9.0  | (-5.9, 26.2) | 0.253 | - | - | - |
| Housekeeping: >1 t/wk           | 4.6  | (-9.8, 21.4)  | 0.550 | 4.7  | (-9.8, 21.4) | 0.548 | - | - | - |

Ceph.: cephalopods; PBDE: Polybrominated diphenyl ether; t/wk: times per week;  $\Sigma$ PBDEs: Sum of BDE-47, -99, -153, and -209.

<sup>a</sup>Percentage change and 95% CI in cord serum PBDE concentrations per interquartile range (IQR) increment in daily intake of shellfish and cephalopods and fish (10.8 and 48.0 g/day, respectively) and per 1-serving increment in weekly intake of large oily fish. Percentage change and 95% CI in cord serum PBDE concentrations with respect to the reference category, being “innerspring” for type of mattress and “ $\leq 1$  times/week” for frequency of housekeeping. <sup>b</sup>OR, 95% CI and p-value from logistic models. Categories of dichotomized BDE-209: <LOD,  $\geq$ LOD.

Models adjusted by alcohol intake (BDE-47, -99), working at week 12 of pregnancy (BDE-153,  $\Sigma$ PBDEs), country of birth and season of the last menstrual period (BDE-209), and total energy intake (all models).

Results are only presented for those variables which were statistically significant in the main analysis.

**Table S5. Association between PBDEs and seafood intake or household-level factors stratified by cohort: The Asturias and Valencia INMA Cohorts (Spain), 2003-2008**

|                       | Stratified: Asturias |                |       | Stratified: Valencia |               |       |
|-----------------------|----------------------|----------------|-------|----------------------|---------------|-------|
|                       | %change              | (95%CI)        | p     | %change              | (95%CI)       | p     |
| <b>BDE-47</b>         |                      |                |       |                      |               |       |
| Shellfish and ceph.   | 13.9                 | (-8.3, 41.5)   | 0.241 | 11.4                 | (-5.6, 31.4)  | 0.203 |
| Fish                  | 21.1                 | (-0.8, 47.8)   | 0.059 | -5.2                 | (-23.2, 17.0) | 0.618 |
| Large oily fish       | 10.1                 | (-1.2, 22.7)   | 0.082 | 0.3                  | (-9.5, 11.2)  | 0.952 |
| Foam mattress         | 3.5                  | (-29.2, 51.5)  | 0.224 | 8.5                  | (-17.5, 42.7) | 0.559 |
| Housekeeping: >1 t/wk | 29.2                 | (-14.5, 95.5)  | 0.223 | 8.7                  | (-15.4, 39.6) | 0.514 |
| <b>BDE-99</b>         |                      |                |       |                      |               |       |
| Shellfish and ceph.   | 16.0                 | (-15.4, 59.1)  | 0.358 | 19.7                 | (-2.0, 46.1)  | 0.078 |
| Fish                  | 19.3                 | (-10.4, 58.9)  | 0.226 | 8.4                  | (-16.1, 40.0) | 0.537 |
| Large oily fish       | 15.6                 | (-0.9, 34.9)   | 0.066 | 8.5                  | (-4.1, 22.9)  | 0.197 |
| Foam mattress         | -29.9                | (-60.4, 24.2)  | 0.221 | 3.6                  | (-25.6, 44.2) | 0.834 |
| Housekeeping: >1 t/wk | -5.4                 | (-47.4, 70.1)  | 0.852 | 13.5                 | (-16.2, 53.7) | 0.415 |
| <b>BDE-153</b>        |                      |                |       |                      |               |       |
| Shellfish and ceph.   | 3.8                  | (-18.0, 31.4)  | 0.757 | -10.8                | (-33.1, 19.0) | 0.437 |
| Fish                  | 17.2                 | (-6.4, 46.8)   | 0.169 | -24.2                | (-45.5, 5.4)  | 0.099 |
| Large oily fish       | 15.9                 | (2.4, 31.1)    | 0.020 | -8.6                 | (-22.3, 7.4)  | 0.272 |
| Foam mattress         | -11.8                | (-42.8, 35.9)  | 0.568 | 36.7                 | (-8.8, 105.0) | 0.130 |
| Housekeeping: >1 t/wk | 47.5                 | (-8.6, 137.8)  | 0.109 | 26.0                 | (-13.8, 84.2) | 0.233 |
| <b>BDE-209</b>        |                      |                |       |                      |               |       |
| Shellfish and ceph.   | 19.4                 | (-18.8, 75.7)  | 0.367 | 23.5                 | (-1.0, 54.1)  | 0.062 |
| Fish                  | 8.2                  | (-26.8, 59.9)  | 0.692 | 10.0                 | (-17.6, 47.0) | 0.519 |
| Large oily fish       | 2.2                  | (-17.6, 26.7)  | 0.842 | 8.9                  | (-4.8, 24.5)  | 0.217 |
| Foam mattress         | 18.0                 | (-45.0, 153.2) | 0.671 | 73.5                 | (23.2, 144.4) | 0.002 |
| Housekeeping: >1 t/wk | -8.4                 | (-59.4, 106.5) | 0.833 | -20.3                | (-42.6, 10.8) | 0.178 |
| <b>ΣPBDEs</b>         |                      |                |       |                      |               |       |
| Shellfish and ceph.   | 8.1                  | (-2.9, 20.3)   | 0.157 | 13.1                 | (-3.1, 31.9)  | 0.119 |
| Fish                  | 9.4                  | (-1.2, 21.1)   | 0.085 | -2.5                 | (-18.5, 16.7) | 0.786 |
| Large oily fish       | 5.2                  | (-0.6, 11.3)   | 0.078 | 3.8                  | (-4.9, 13.4)  | 0.403 |
| Foam mattress         | 0.02                 | (-17.4, 21.1)  | 0.998 | 22.9                 | (-2.3, 54.5)  | 0.079 |
| Housekeeping: >1 t/wk | 2.9                  | (-16.4, 26.6)  | 0.790 | 5.9                  | (-14.3, 30.9) | 0.597 |

Ceph.: cephalopods; PBDE: Polybrominated diphenyl ether; t/wk: times per week; ΣPBDEs: Sum of BDE-47, -99, -153, and -209. Percentage change and 95% CI in cord serum PBDE concentrations per interquartile range (IQR) increment in daily intake of shellfish and cephalopods and fish (10.8 and 48.0 g/day, respectively) and per 1-serving increment in weekly intake of large oily fish. Percentage change and 95% CI in cord serum PBDE concentrations with respect to the reference category, being “innerspring” for type of mattress and “≤1 times/week” for frequency of housekeeping.

Models adjusted by alcohol intake (BDE-47, -99), working at week 12 of pregnancy (BDE-153,  $\Sigma$ PBDEs), country of birth and season of the last menstrual period (BDE-209), and total energy intake (all models).

Results are only presented for those variables which were statistically significant in the joint models.
